# Supplementary material
Source: PubMed Central journal article supplement (PMC10375387)
Supplement: jamaophthalmol-e233119-s002.pdf [file jamaophthalmol-e233119-s002.pdf]

## Data Sharing Statement

Hua. Evaluation and Comparison of Ophthalmic Scientific Abstracts and References by Current Artificial Intelligence Chatbots. *JAMA Ophthalmol*. Published July 27, 2023. doi:10.1001/jamaophthalmol.2023.3119

### Data

**Data available:** Yes

**Data types:** Data (not involving human participants)

**How to access data:** Supplemental Table. Additional data available by email, [hongyuenhua@gmail.com](mailto:hongyuenhua@gmail.com)

**When available:** With publication

### Supporting Documents

**Document types:** Other (please specify)

**Additional Information:** Raw data

**How to access documents:** [hongyuenhua@gmail.com](mailto:hongyuenhua@gmail.com)

**When available:** With publication

### Additional Information

**Who can access the data:** anyone requesting the data

**Types of analyses:** for any purpose

**Mechanisms of data availability:** with investigator support
